# Supplementary material
Source: PubMed Central journal article supplement (PMC6124347)
Supplement: mmc1.pdf [file mmc1.pdf]

**Supplementary Table:** Summary of contents of loose sheets of material.

(a) 'Oldham' boxes

| <i>Year</i> | <i>Cases (n)</i> | <i>Sheets (n)</i> | <i>Notes</i>                                                                                                          |
|-------------|------------------|-------------------|-----------------------------------------------------------------------------------------------------------------------|
| 1969        | 32               | 48                | 7 pages=lists of 47 names, 59 cycles (JP); 10 folded 'scraps' of lap details (6 by RGE), 1 page scribbled notes (RGE) |
| 1970        | 61               | 133               | L200-L260, occasional single line notes from RGE/PCS                                                                  |
| 1971        | 40               | 91                | L261-L304; occasional single line notes (JP), lists of supplies needed                                                |
| 1972        | 39               | 76                | L305 - L399; 1 page list; short notes by JP/PCS; 5 lab OCR notes (JP); 1 'scrap' RGE; PCS short comments x3           |
| 1973        | 27               | 40+1              | Aspiration details only; 10 lab notes (JP) 1 paper towel (RGE/JP, name, no date); limerick about JP                   |
| 1974        | 37               | 62                | Incl. 13 pages of lists/media calculations                                                                            |
| 1975        | 32               | 39                | Incl. JP egg notes x3, RGE notes x1, note from RGE to PCS + reply (June)                                              |
| 1976        | 9                | 9                 | follicle aspiration only, + egg details x9 (JP), media calculations (RGE)                                             |
| 1977        | 12               | 21                | incl. lists, calculations, notes (RGE & JP)                                                                           |
| Subtotal    | 289              | 479               |                                                                                                                       |

(b) 'Patient Matters' boxes

| <i>Year</i>   | <i>Folder</i> | <i>Sheets (n)</i> | <i>Description</i>                                                                                                |
|---------------|---------------|-------------------|-------------------------------------------------------------------------------------------------------------------|
| 1969–<br>1977 | 11            | 5                 | Lists of approximately 120 curettings/biopsies, including D2 biopsies                                             |
| 1970          | 11            | 1                 | List of 18 endometrial biopsy results                                                                             |
| 1970          | 18            | 3                 | Letter from BV Lewis re collaboration, Aug 17th; list of 43 names of vasectomy patients, April – July 1970        |
| 1975          | 11            | 16                | ODGH Results of urine and blood tests, incl. 5 semen assessments                                                  |
| 1976          | 11            | 5                 | ODGH Results of urine & blood tests                                                                               |
| 1976          | 11            | 3                 | Handwritten notes with histology reports for pre-clinical pregnancies                                             |
| 1978          | 8             | 20                | Patient questionnaires (menstrual/gynaecological history) + instructions for urine collection                     |
| 1978          | 9             | 6                 | HiGonavis results for L670, 671, 672, 675, Jan 1978<br>List of names on back of Sterilization Pack envelope, 1978 |
| 1978          | 16            | 1                 | Letter from patient who thinks she is pregnant (L741)                                                             |

|          |    |    |                                                                                                                                                                                                                                                  |
|----------|----|----|--------------------------------------------------------------------------------------------------------------------------------------------------------------------------------------------------------------------------------------------------|
| 1978     | 11 | 4  | List of 16 patient names, age, LMP, brief clinical notes:<br>"Patients for Kershaws" (PCS)                                                                                                                                                       |
| No date  | 9  | 1  | E2 & P levels in serum and FF samples, 16 listed                                                                                                                                                                                                 |
| No date  | 9  | 2  | Data for "Fig 24": Medication, TE, PD, HCG, Ethinyl Estradiol, Oral Primolut, Primolut Depot: 2 sheets                                                                                                                                           |
| No date  | 9  | 6  | Envelope with 16 typed patient details – name, address                                                                                                                                                                                           |
| No date  | 19 | 3  | Alphabetical list "All patients ever admitted to Dr Kershaw's for oocytes"<br>Name + address + hospital number<br>89 names/130 cycles                                                                                                            |
| No date  | 11 | 1  | Index Card with notes regarding ovum donation: law, consent, racial & genetic aspects, illness & disease, age for chromosomal anomalies, recipient's husband, non identity/privacy, matching – RGE & PCS to discuss in detail with patients (JP) |
| Subtotal | –  | 77 |                                                                                                                                                                                                                                                  |

(c) 'Data/Journals/Paper' folder

| <i>Year</i> | <i>Folder</i> | <i>Sheets (n)</i> | <i>Description</i>                                                |
|-------------|---------------|-------------------|-------------------------------------------------------------------|
| 1970        | 5             | 12                | Correspondence with Flow Laboratories, Hoechst, BDH and Millipore |
| No date     | 5             | 3                 | Media formulas/recipes                                            |
| Subtotal    | –             | 15                |                                                                   |
| Total       | –             | 571               |                                                                   |

HCG = human chorionic gonadotropin; JP = Jean Purdy; LMP = last menstrual period; ODGH = Oldham District and General Hospital; PCS = Patrick Steptoe; PD = pregnandiol ; RGE = Robert Edwards; TE = Total Estrogens;
